# Supplementary material for: Zika Virus Infection as a Cause of Congenital Brain Abnormalities and Guillain–Barré Syndrome: Systematic Review
Source: PubMed Central journal article supplement (PMC5207634; doi:10.1371/journal.pmed.1002203), 2017-01-03
Supplement: pmed.1002203.s005.pdf [file pmed.1002203.s005.pdf]

## S2 Table

S1 Table. Zika causality framework, version 9

| 1. Temporality               |                                                                                                                                                                                                                                                                                                                    |                                                                                                                                                                                                                                                                 |
|------------------------------|--------------------------------------------------------------------------------------------------------------------------------------------------------------------------------------------------------------------------------------------------------------------------------------------------------------------|-----------------------------------------------------------------------------------------------------------------------------------------------------------------------------------------------------------------------------------------------------------------|
|                              | Congenital abnormalities                                                                                                                                                                                                                                                                                           | Guillain-Barré syndrome                                                                                                                                                                                                                                         |
| <b>Individual level data</b> | <p><b>1.1a.</b> Does Zika virus (ZIKV) infection precede the development of congenital abnormalities in individuals?</p> <p><b>1.2.</b> Is the timing of Zika infection during gestation and the observed pattern of congenital abnormalities compatible with the expected stage of embryological development?</p> | <p><b>1.1a.</b> Does ZIKV infection precede the development of Guillain-Barré syndrome in individuals?</p> <p><b>1.2.</b> Is the interval between exposure to ZIKV and occurrence of symptoms typical for para- or post-infectious Guillain-Barré syndrome?</p> |
| <b>Study types</b>           | Cohort study, case-control study, case series, case report                                                                                                                                                                                                                                                         |                                                                                                                                                                                                                                                                 |
| <b>Population level data</b> | <b>1.1b.</b> Is there a consistent time-dependent relationship between the occurrence of ZIKV cases and cases with the outcome of interest at population-level?                                                                                                                                                    |                                                                                                                                                                                                                                                                 |
| <b>Study types</b>           | Ecological time-trend study                                                                                                                                                                                                                                                                                        |                                                                                                                                                                                                                                                                 |

| 2. Biological plausibility               |                                                                                                                                                                                                                                                                                                                                                                                                                                                                                                                                                                                                                                                                                                                                                                                                                                                                                               |                                                                                                                                                                                                                                                                                                                             |
|------------------------------------------|-----------------------------------------------------------------------------------------------------------------------------------------------------------------------------------------------------------------------------------------------------------------------------------------------------------------------------------------------------------------------------------------------------------------------------------------------------------------------------------------------------------------------------------------------------------------------------------------------------------------------------------------------------------------------------------------------------------------------------------------------------------------------------------------------------------------------------------------------------------------------------------------------|-----------------------------------------------------------------------------------------------------------------------------------------------------------------------------------------------------------------------------------------------------------------------------------------------------------------------------|
|                                          | Congenital abnormalities                                                                                                                                                                                                                                                                                                                                                                                                                                                                                                                                                                                                                                                                                                                                                                                                                                                                      | Guillain-Barré syndrome                                                                                                                                                                                                                                                                                                     |
| <b>Individual level data<sup>a</sup></b> | <p><b>2.1.</b> Which cell receptor(s) bind the ligand of ZIKV in humans?</p> <p><b>2.2.</b> Which tissues express such receptor(s) and at which gestational age are they expressed?</p> <p><b>2.3.</b> Can ZIKV particles be found in the placenta, umbilical cord blood and/or amniotic fluid of previously or currently infected mothers and if yes, with what probability?</p> <p><b>2.4.</b> Are the ZIKV particles in the placenta/amniotic fluid/umbilical cord infectious/capable of replication?</p> <p><b>2.5.</b> Can ZIKV particles be found in brain or other tissues of cases with congenital abnormalities?</p> <p><b>2.6.</b> Are the ZIKV particles found in the brain infectious/capable of replication?</p> <p><b>2.7.</b> Are there experimental studies that describe plausible biological mechanisms by which ZIKV infection could lead to congenital abnormalities?</p> | <p><b>2.1.</b> Do ZIKV epitopes mimic host antigens (molecular mimicry)?</p> <p><b>2.2.</b> Does ZIKV infection lead to an increase in detectable autoreactive immune cells or autoreactive antibodies?</p> <p><b>2.3.</b> Are there other biologically plausible mechanisms by which ZIKV infection could lead to GBS?</p> |
| <b>Study types</b>                       | Basic research (protein expression, cell culture), case report, case-control study, cohort study, systematic review                                                                                                                                                                                                                                                                                                                                                                                                                                                                                                                                                                                                                                                                                                                                                                           |                                                                                                                                                                                                                                                                                                                             |

| 3. Strength of the association |                                                                                                                        |                         |
|--------------------------------|------------------------------------------------------------------------------------------------------------------------|-------------------------|
|                                | Congenital abnormalities                                                                                               | Guillain-Barré syndrome |
| <b>Individual level data</b>   | <b>3.1a.</b> How strong is the association between ZIKV infection and the outcome of interest at the individual level? |                         |
| <b>Study types</b>             | Cohort study, case-control study, cross-sectional                                                                      |                         |
| <b>Population level data</b>   | <b>3.1b.</b> How strong is the association between ZIKV infection and the outcome of interest at the population level? |                         |
| <b>Study types</b>             | Ecological study                                                                                                       |                         |

| 4. Exclusion of alternative explanations |                                                                                                                                                                                                                                                                                                                                                                           |                                                                                                                                                                                                                               |
|------------------------------------------|---------------------------------------------------------------------------------------------------------------------------------------------------------------------------------------------------------------------------------------------------------------------------------------------------------------------------------------------------------------------------|-------------------------------------------------------------------------------------------------------------------------------------------------------------------------------------------------------------------------------|
|                                          | Congenital abnormalities                                                                                                                                                                                                                                                                                                                                                  | Guillain-Barré syndrome                                                                                                                                                                                                       |
| <b>Individual level data</b>             | Have other explanations/confounders been excluded, such as<br><b>4.1.</b> TORCHS or other congenital infections<br><b>4.2.</b> Maternal exposure to toxic chemicals (heavy metals, pesticides, drugs, alcohol, others)<br><b>4.3.</b> Maternal or foetal malnutrition<br><b>4.4.</b> Hypoxic-ischaemic lesions<br><b>4.5.</b> Genetic conditions<br><b>4.6.</b> Radiation | Have other explanations/confounders been excluded, such as<br><b>4.1.</b> Other infections<br><b>4.2.</b> Vaccines<br><b>4.3.</b> Underlying systemic disease<br><b>4.4.</b> concomitant medication, drugs or other chemicals |
| <b>Study types</b>                       | Case-control study, cohort study, case series, case report, environmental sampling                                                                                                                                                                                                                                                                                        |                                                                                                                                                                                                                               |

TORCHS, toxoplasmosis, rubella, cytomegalovirus, herpes simplex, syphilis

| 5. Cessation/reversibility/preventability |                                                                                                                                                                                                                                                                                                                                                                                        |                         |
|-------------------------------------------|----------------------------------------------------------------------------------------------------------------------------------------------------------------------------------------------------------------------------------------------------------------------------------------------------------------------------------------------------------------------------------------|-------------------------|
|                                           | Congenital abnormalities                                                                                                                                                                                                                                                                                                                                                               | Guillain-Barré syndrome |
| <b>Individual level data</b>              | <b>5.1a.</b> Does the intentional prevention/removal/elimination of ZIKV infection in individuals, e.g. by insect repellents, lead to a reduction in cases with the outcome of interest?                                                                                                                                                                                               |                         |
| <b>Study types</b>                        | Randomised controlled trials of insect repellents or other interventions                                                                                                                                                                                                                                                                                                               |                         |
| <b>Population level data</b>              | <b>5.1b.</b> Does the intentional removal/elimination/prevention of ZIKV at population-level, e.g. by vector control, lead to a reduction in cases with the outcome?<br><br><b>5.2b.</b> Does a natural removal/elimination/prevention of ZIKV at population-level, e.g. increase in immune individuals or decrease in vector abundance lead to a reduction in cases with the outcome? |                         |
| <b>Study types</b>                        | Experimental vector control interventions, ecological time-trend study, seroprevalence study                                                                                                                                                                                                                                                                                           |                         |

| 6. Dose-response relationship (biological gradient) |                                                                                                                                                                                                                                                                                                                                                                         |                                                                                                                                        |
|-----------------------------------------------------|-------------------------------------------------------------------------------------------------------------------------------------------------------------------------------------------------------------------------------------------------------------------------------------------------------------------------------------------------------------------------|----------------------------------------------------------------------------------------------------------------------------------------|
|                                                     | Congenital abnormalities                                                                                                                                                                                                                                                                                                                                                | Guillain-Barré syndrome                                                                                                                |
| <b>Individual level data</b>                        | <b>6.1.</b> Are the risk and the clinical severity of congenital abnormalities associated with the viral load in maternal serum, urine, the placenta and/or amniotic fluid?<br><br><b>6.2.</b> Are the risk and the clinical severity of congenital abnormalities associated with the clinical severity (including being asymptomatic) of ZIKV infection in the mother? | <b>6.1.</b> Are the risk and the clinical severity of Guillain-Barré syndrome associated with viral titres or viral load in the urine? |
| <b>Study types</b>                                  | Cohort study, case series, case reports                                                                                                                                                                                                                                                                                                                                 |                                                                                                                                        |

| 7. Animal experiments        |                                                                                                                                                                                                                                                                                                                                                                                                                                                                                                                                              |                                                                                                                                                                                                                                            |
|------------------------------|----------------------------------------------------------------------------------------------------------------------------------------------------------------------------------------------------------------------------------------------------------------------------------------------------------------------------------------------------------------------------------------------------------------------------------------------------------------------------------------------------------------------------------------------|--------------------------------------------------------------------------------------------------------------------------------------------------------------------------------------------------------------------------------------------|
|                              | Congenital abnormalities                                                                                                                                                                                                                                                                                                                                                                                                                                                                                                                     | Guillain-Barré syndrome                                                                                                                                                                                                                    |
| <b>Individual level data</b> | <b>7.1.</b> Does inoculation of pregnant female animals with ZIKV cause congenital abnormalities in the offspring?<br><br><b>7.2.</b> Does intracerebral inoculation of animals with ZIKV lead to viral replication in the central nervous system?<br><br><b>7.3.</b> Does any other route of inoculation of animals with ZIKV lead to viral replication in the central nervous system?<br><br><b>7.4.</b> Do other experiments with animals or animal-derived cells support the association of ZIKV infection and congenital abnormalities? | <b>7.1.</b> Does inoculation of animals with ZIKV lead to an autoimmune reaction resulting in peripheral neuropathy?<br><br><b>7.2.</b> Do other animal experiments support the association of ZIKV infection and Guillain-Barré syndrome? |

## S2 Table

|                    |                                    |
|--------------------|------------------------------------|
| <b>Study types</b> | Basic research: animal experiments |
|--------------------|------------------------------------|

| <b>8. Analogy</b>            |                                                                                                                                                                                                                                                                                                           |                                |
|------------------------------|-----------------------------------------------------------------------------------------------------------------------------------------------------------------------------------------------------------------------------------------------------------------------------------------------------------|--------------------------------|
|                              | <b>Congenital abnormalities</b>                                                                                                                                                                                                                                                                           | <b>Guillain-Barré syndrome</b> |
| <b>Individual level data</b> | <b>8.1.</b> Do other flaviviruses or arboviruses cause the outcome of interest and by which mechanism(s)?<br><b>8.2.</b> Do other pathogens cause the outcome of interest and by which mechanism(s)?<br><b>8.3.</b> Which pathogen or host factors facilitate the development of the outcome of interest? |                                |
| <b>Study types</b>           | Systematic review                                                                                                                                                                                                                                                                                         |                                |

| <b>9. Specificity</b>        |                                                                                                             |                                |
|------------------------------|-------------------------------------------------------------------------------------------------------------|--------------------------------|
|                              | <b>Congenital abnormalities</b>                                                                             | <b>Guillain-Barré syndrome</b> |
| <b>Individual level data</b> | <b>9.1.</b> Are there pathological findings in cases with the outcome that are specific for ZIKV infection? |                                |
| <b>Study types</b>           | cohort study, case-control study, case series, case report, review                                          |                                |

| <b>10. Consistency / replicability</b> |                                                                                                                                                                                                                                                              |                                |
|----------------------------------------|--------------------------------------------------------------------------------------------------------------------------------------------------------------------------------------------------------------------------------------------------------------|--------------------------------|
|                                        | <b>Congenital abnormalities</b>                                                                                                                                                                                                                              | <b>Guillain-Barré syndrome</b> |
| <b>Individual level data</b>           | Is the association between ZIKV infection and cases with the outcome consistently found across different<br><b>10.1.</b> Geographical regions<br><b>10.2.</b> Populations/subpopulations<br><b>10.3.</b> ZIKV lineages/strains<br><b>10.4.</b> Study designs |                                |
| <b>Study types</b>                     | Systematic reviews, other appropriate epidemiological study types                                                                                                                                                                                            |                                |

| <b>Co-factors</b>            |                                                                                                                                                                                                                                                                                                                                                                                                                                                                                                                                   |                                |
|------------------------------|-----------------------------------------------------------------------------------------------------------------------------------------------------------------------------------------------------------------------------------------------------------------------------------------------------------------------------------------------------------------------------------------------------------------------------------------------------------------------------------------------------------------------------------|--------------------------------|
|                              | <b>Congenital abnormalities</b>                                                                                                                                                                                                                                                                                                                                                                                                                                                                                                   | <b>Guillain-Barré syndrome</b> |
| <b>Individual level data</b> | Are there co-factors contributing to the development the outcome after ZIKV infection such as<br><b>1.</b> Concurrent or previous dengue infection (antibody dependent enhancement)<br><b>2.</b> Other concurrent or previous infections<br><b>3.</b> Underlying systemic diseases<br><b>4.</b> Polymorphism/deletion of specific host immune system genes or general genetic predisposition<br><b>5.</b> Specific pathogen factors<br><b>6.</b> Concomitant medication, recreational drugs or other chemicals<br><b>7.</b> Other |                                |
| <b>Study types</b>           | Cohort study, case-control study, case series, case report                                                                                                                                                                                                                                                                                                                                                                                                                                                                        |                                |
