# Supplementary material for: Zika Virus Infection as a Cause of Congenital Brain Abnormalities and Guillain–Barré Syndrome: Systematic Review
Source: PubMed Central journal article supplement (PMC5207634; doi:10.1371/journal.pmed.1002203), 2017-01-03
Supplement: pmed.1002203.s006.pdf [file pmed.1002203.s006.pdf]

## S3 Table

S1 Table. Characteristics of included and excluded items, total 1091 unique items

|                                                                                      | Excluded items  |            | Included items  |            | p-value |
|--------------------------------------------------------------------------------------|-----------------|------------|-----------------|------------|---------|
|                                                                                      | Number of items | %          | Number of items | %          |         |
| <b>Source</b>                                                                        |                 |            |                 |            | <0.001  |
| ArXiv                                                                                | 8               | 0.8        | 0               | 0          |         |
| BiorXiv                                                                              | 36              | 3.7        | 8               | 7.5        |         |
| CDC                                                                                  | 2               | 0.2        | 0               | 0          |         |
| ECDC                                                                                 | 26              | 2.6        | 1               | 0.9        |         |
| EID                                                                                  | 6               | 0.6        | 2               | 1.9        |         |
| Embase                                                                               | 124             | 12.6       | 3               | 2.8        |         |
| Eurosurveillance                                                                     | 3               | 0.3        | 1               | 0.9        |         |
| F1000                                                                                | 16              | 1.6        | 0               | 0          |         |
| Institute de veille sanitaire                                                        | 22              | 2.2        | 1               | 0.9        |         |
| Lancet                                                                               | 12              | 1.2        | 0               | 0          |         |
| LILACS                                                                               | 21              | 2.1        | 0               | 0          |         |
| Other                                                                                | 0               | 0          | 1               | 0.9        |         |
| PAHO                                                                                 | 2               | 0.2        | 19              | 17.9       |         |
| PeerJ Preprints                                                                      | 4               | 0.4        | 2               | 1.9        |         |
| PLoS                                                                                 | 3               | 0.3        | 0               | 0          |         |
| Pubmed                                                                               | 670             | 68         | 65              | 61.3       |         |
| WHO                                                                                  | 15              | 1.5        | 2               | 1.9        |         |
| WHO Zika open                                                                        | 15              | 1.5        | 1               | 0.9        |         |
| <i>Total</i>                                                                         | <i>985</i>      | <i>100</i> | <i>106</i>      | <i>100</i> |         |
| <b>Type of information</b>                                                           |                 |            |                 |            | <0.001  |
| Scientific (journal) article                                                         | 837             | 85         | 82              | 77.4       |         |
| Surveillance report or data                                                          | 75              | 7.6        | 23              | 21.7       |         |
| News item or lay press                                                               | 70              | 7.1        | 0               | 0          |         |
| Biological database                                                                  | 0               | 0          | 1               | 0.9        |         |
| Other                                                                                | 3               | 0.3        | 0               | 0          |         |
| <i>Total</i>                                                                         | <i>985</i>      | <i>100</i> | <i>106</i>      | <i>100</i> |         |
| <b>Peer-reviewed</b>                                                                 |                 |            |                 |            | 0.015   |
| No                                                                                   | 120             | 14.3       | 16              | 19.5       |         |
| Yes                                                                                  | 508             | 60.7       | 57              | 69.5       |         |
| Unknown/unclear                                                                      | 209             | 25         | 9               | 11         |         |
| <i>Total (scientific journal articles)</i>                                           | <i>837</i>      | <i>100</i> | <i>82</i>       | <i>100</i> |         |
| <b>Type of scientific article</b>                                                    |                 |            |                 |            | <0.001  |
| Original research                                                                    | 372             | 44.4       | 81              | 98.8       |         |
| Review                                                                               | 116             | 13.9       | 1               | 1.2        |         |
| Comment/Editorial/Perspective/Letter                                                 | 340             | 40.6       | 0               | 0          |         |
| Other                                                                                | 9               | 1.1        | 0               | 0          |         |
| <i>Total (scientific journal articles)</i>                                           | <i>837</i>      | <i>100</i> | <i>82</i>       | <i>100</i> |         |
| <b>Type of research</b>                                                              |                 |            |                 |            | 0.005   |
| Clinical/epidemiological research                                                    | 376             | 66.8       | 73              | 68.9       |         |
| Basic and applied biomedical research                                                | 123             | 21.8       | 32              | 30.2       |         |
| Environmental and vector research                                                    | 63              | 11.2       | 1               | 0.9        |         |
| Other                                                                                | 1               | 0.2        | 0               | 0          |         |
| <i>Total (original research, review, surveillance report or biological database)</i> | <i>563</i>      | <i>100</i> | <i>106</i>      | <i>100</i> |         |
| <b>Type of study</b>                                                                 |                 |            |                 |            | <0.001  |
| Case report                                                                          | 52              | 9.3        | 18              | 17         |         |
| Case series                                                                          | 26              | 4.6        | 27              | 25.5       |         |
| Case-control study                                                                   | 0               | 0          | 1               | 0.9        |         |
| Cohort study                                                                         | 3               | 0.5        | 1               | 0.9        |         |
| Cross-sectional study                                                                | 60              | 10.7       | 1               | 0.9        |         |
| Diagnostic study                                                                     | 7               | 1.2        | 0               | 0          |         |
| Ecological study/outbreak report                                                     | 84              | 14.9       | 23              | 21.7       |         |

### S3 Table

|                                                                                      |            |            |            |            |       |
|--------------------------------------------------------------------------------------|------------|------------|------------|------------|-------|
| Guidelines                                                                           | 13         | 2.3        | 0          | 0          |       |
| Modelling study                                                                      | 27         | 4.8        | 2          | 1.9        |       |
| Qualitative study                                                                    | 9          | 1.6        | 0          | 0          |       |
| Epidemiological/clinical review                                                      | 91         | 16.2       | 0          | 0          |       |
| Other clinical/epidemiological                                                       | 4          | 0.7        | 0          | 0          |       |
| Animal experiment                                                                    | 17         | 3          | 18         | 17         |       |
| In vitro experiment                                                                  | 16         | 2.8        | 10         | 9.4        |       |
| Sequence analysis and phylogenetics                                                  | 47         | 8.4        | 4          | 3.8        |       |
| Basic research review                                                                | 13         | 2.3        | 0          | 0          |       |
| Biochemical/protein structure studies                                                | 7          | 1.2        | 0          | 0          |       |
| Other basic research                                                                 | 23         | 4.1        | 0          | 0          |       |
| Vector competence studies                                                            | 8          | 1.4        | 0          | 0          |       |
| Ecological/animal cross-sectional                                                    | 27         | 4.8        | 1          | 0.9        |       |
| Ecological/vector modelling                                                          | 4          | 0.7        | 0          | 0          |       |
| Ecological/Vector review                                                             | 8          | 1.4        | 0          | 0          |       |
| Vector control studies                                                               | 8          | 1.4        | 0          | 0          |       |
| Other ecological                                                                     | 8          | 1.4        | 0          | 0          |       |
| <i>Total (original research, review, surveillance report or biological database)</i> | <i>562</i> | <i>100</i> | <i>106</i> | <i>100</i> |       |
| <b>Decade of publication</b>                                                         |            |            |            |            | 0.221 |
| 1950-1959                                                                            | 18         | 1.8        | 5          | 4.7        |       |
| 1960-1969                                                                            | 23         | 2.3        | 1          | 0.9        |       |
| 1970-1979                                                                            | 24         | 2.4        | 2          | 1.9        |       |
| 1980-1989                                                                            | 17         | 1.7        | 0          | 0          |       |
| 1990-1999                                                                            | 12         | 1.2        | 0          | 0          |       |
| 2000-2009                                                                            | 16         | 1.6        | 1          | 0.9        |       |
| 2010-present                                                                         | 875        | 88.8       | 97         | 91.5       |       |
| <i>Total</i>                                                                         | <i>985</i> | <i>100</i> | <i>106</i> | <i>100</i> |       |
